# Supplementary material for: The RNA‐binding protein MEX3A is a prognostic factor and regulator of resistance to gemcitabine in pancreatic ductal adenocarcinoma
Source: PubMed Central journal article supplement (PMC7858117; doi:10.1002/1878-0261.12847), 2020-11-24
Supplement: MOL2-15-579-s001.pdf [file MOL2-15-579-s001.pdf]

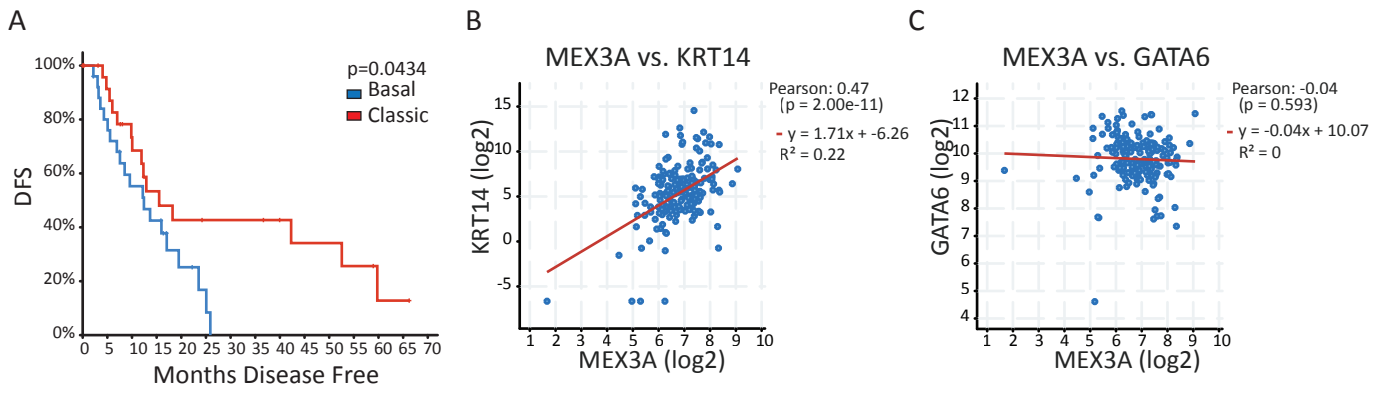

**Supplementary Figure 1. A)** Kaplan-Meier curve of DFS for basal and classic subtype of pancreatic cancer in PDAC patients. Statistical analyses were performed by log rank test. **B-C)** Scatter plot of Pearson's correlation analysis of MEX3A and KRT14 (**B**) or GATA6 (**C**) performed using the cBioPortal database.

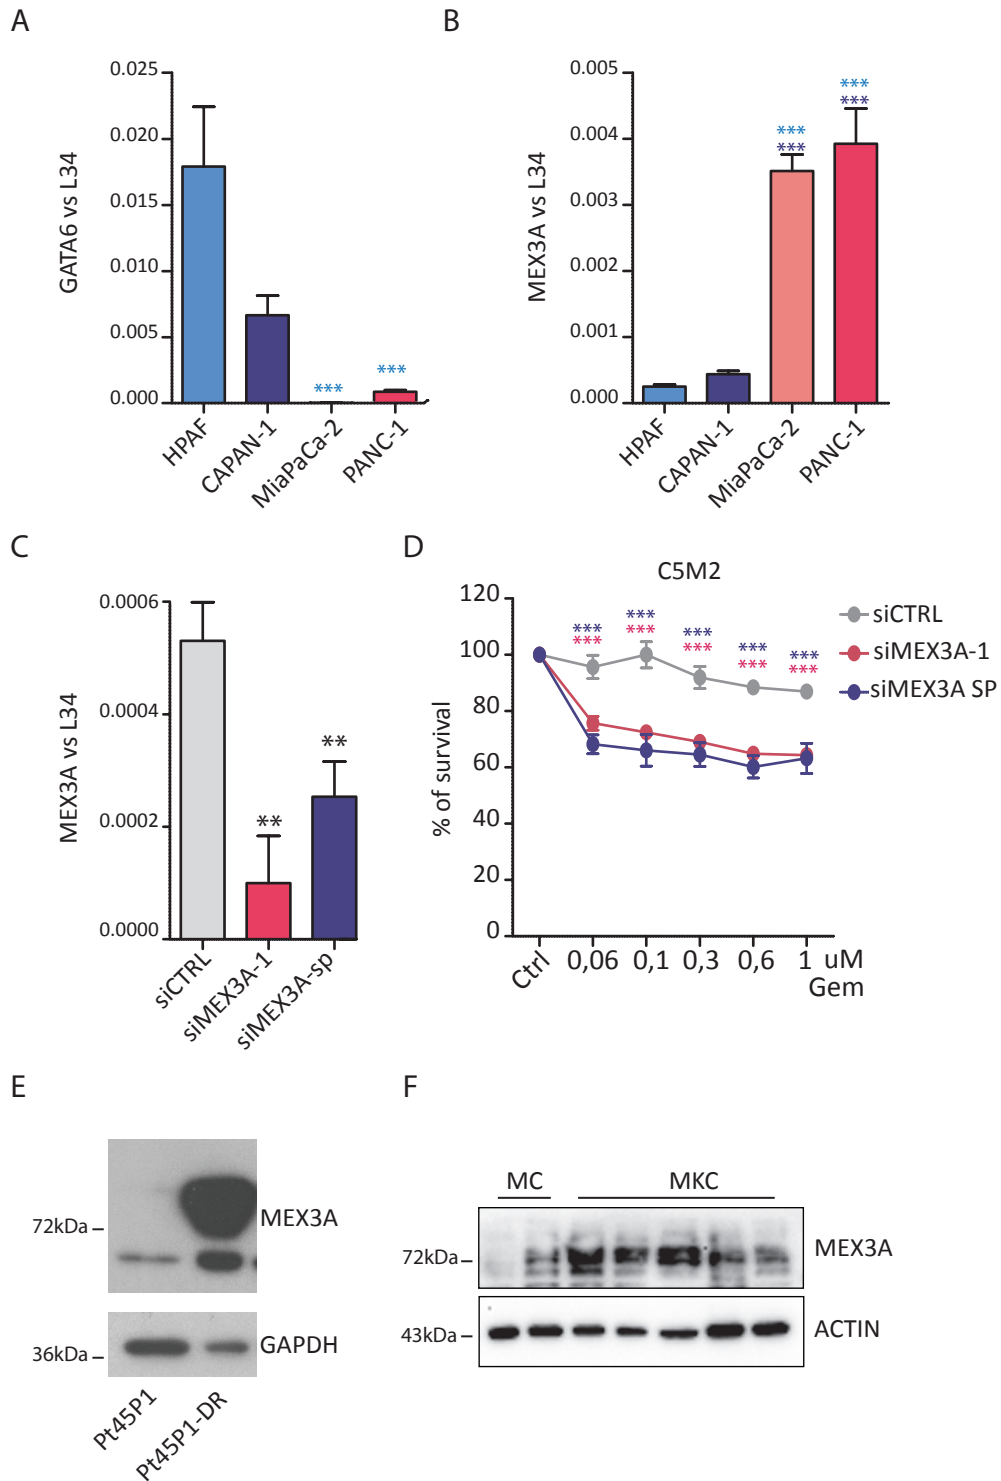

**Supplementary Figure 2.** **A)** Analysis by qPCR of *MEX3A* (**A**) and *GATA6* (**B**) expression levels in PDAC cell lines. **C)** Analysis by qPCR of the *MEX3A* expression levels in C5M2 cells transfected with the indicated siRNAs. **D)** Percentage of survival evaluated by MTS assay after 72h of treatment with different doses of gemcitabine in C5M2 cells transfected with CTRL, *MEX3A* or *MEX3A* SP siRNAs. **E)** Western blot analysis of *MEX3A* expression in Pt45P1-DR cells. Statistical analyses were performed by one way Anova (**A-B-C**) and two way Anova (**D**). \*\*  $P \leq 0.01$ , \*\*\*  $P \leq 0.001$ .

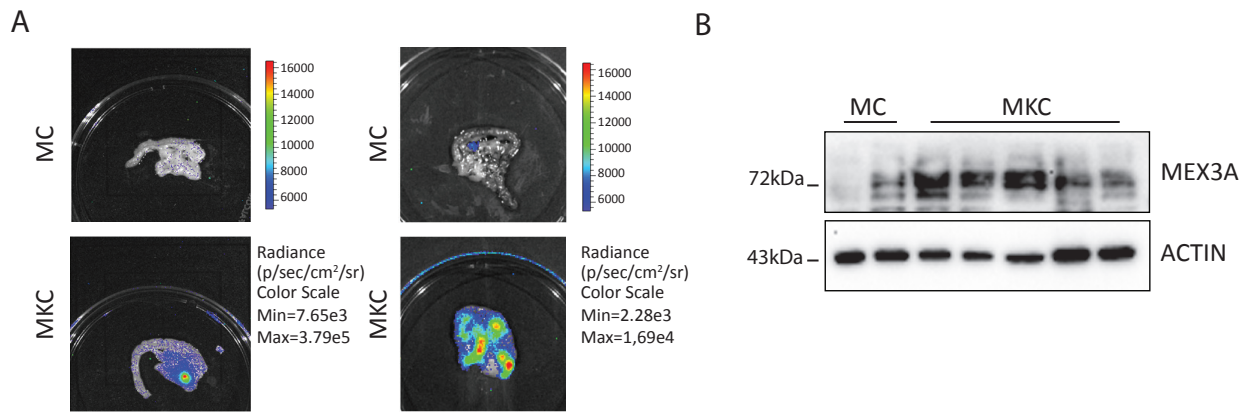

**Supplementary Figure 3. A)** Ex-vivo images of the isolated pancreas of MC and MKC mice performed by BLI.

**B)** Western blot analysis of MEX3A protein expression in MKC and MC mice.

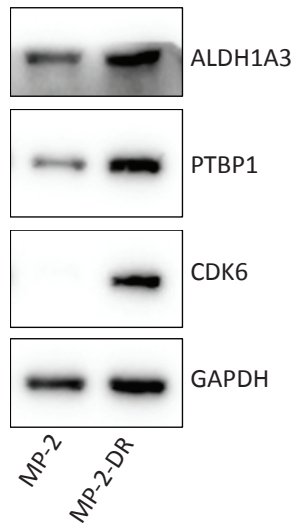

**Supplementary Figure 4.** Western blot analysis of the expression of MEX3A targets (PTBP1, ALDH1A3 and CDK6) in MP-2-DR and parental MiaPaCa-2 cells.

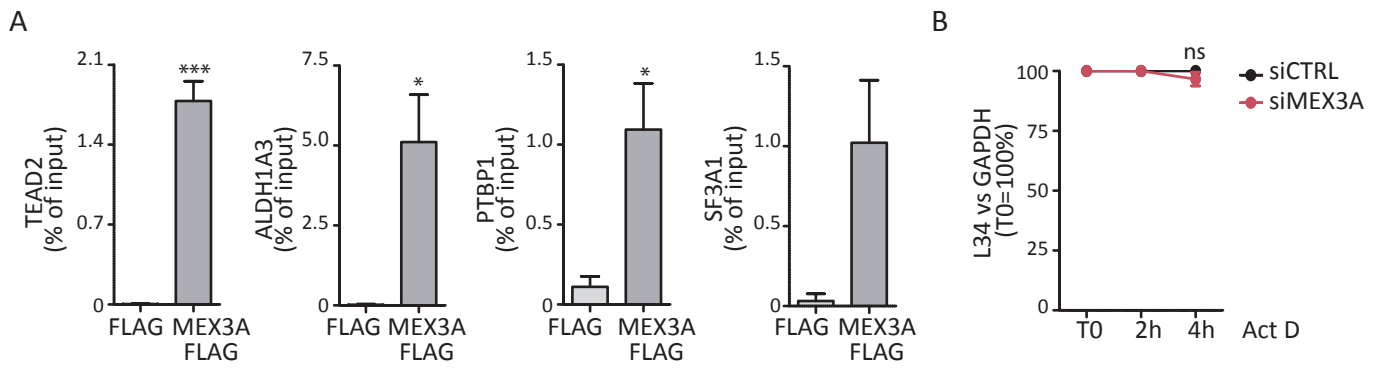

**Supplementary Figure 5. A)** Bar graphs shows the results of qPCR analyses of TEAD2, ALDH1A3, PTBP1 and SF3A1 mRNAs co-precipitated by FLAG antibody in CLIP experiments. The samples are normalized with respect to input. **B)** L34 transcript stability after depletion of MEX3A and treatment with Actinomycin D for the indicated time. The qPCR data were normalized to GAPDH mRNA levels and the T0 value was set to 100%. Statistical analyses were performed by Student's t-test **(A)** and two way Anova **(B)**. \*P ≤ 0.05, \*\*\*P ≤ 0.001.

Supplementary table 1

List of oligonucleotides used in this study:

|              |                                  |
|--------------|----------------------------------|
| hALDH1A fw   | GGGCCAGTGCAACCAATACT             |
| hALDH1A rv   | TGTGCATAGAGGGCGTTGTAG            |
| mALDH1A fw   | TCAACAACGACTGGCACGAA             |
| mALDH1A rv   | CCTTGTCCACATCGGGCTTAT            |
| hCDK6 fw     | TGACCAGCAGCGGACAAATA             |
| hCDK6 rv     | CAAGACTTCGGGTGCTCTGT             |
| hGAPDH fw    | CCCTTCATTGACCTCAACTACATG         |
| hGAPDH rv    | TGGGATTTCCATTGATGACAAGC          |
| hGATA6 fw    | GCCAACTGTCACACCACAAC             |
| hGATA6 rv    | CATAGCAAGTGGTCTGGGC              |
| hL34 fw      | GTCCCGAACCCCTGGTAATAGA           |
| hL34 rv      | GGCCCTGCTGACATGTTTCTT            |
| mL34 fw      | GGTGCTCAGAGGCACTCAGGATG          |
| mL34 rv      | GTGCTTTCCCAACCTTCTTGGTGT         |
| hMEX3A fw    | TCTACAAAGAGGGCCGAGCTG            |
| hMEX3A rv    | CCCTCACCGGTGTCTTGATG             |
| mMEX3A rv    | CCCTCAGAGCCTTAATCTTGC            |
| hPTBP1 fw    | GGAAGGTCACCAACCTCCTG             |
| hPTBP1 rv    | GGAGAGCTGTCGGTCTTCAG             |
| mPTBP1 fw    | GAGGAGGCTGCCAACACTATG            |
| mPTBP1 rv    | CGGTCTTGAGCTCTTTGTGGT            |
| hSF3A1 fw    | CAGCGAGTTCAAGGAAGGGA             |
| hSF3A1 rv    | TGGTCTCTTGGATTACTTGGGC           |
| HTCF7 fw     | CCCCCAACTCTCTCTACGA              |
| hTCF7 rv     | AGGTCAGGGAGTAGAAGCCA             |
| hTEAD2 fw    | ACCGCCAGATGCAGTTGATT             |
| hTEAD2 rv    | GTCGTAGATCTGCCGGACG              |
| MITO fw      | TGTAGACAAGGAAACAACAAAGCCTGGTGGCC |
| MITO rv      | GGCGTCTTCCATTTTACCAACAGTACCGG    |
| Kras fw      | GTCTTTCCCCAGCACAGTGC             |
| Kras rv      | CTCTTGCCTACGCCACCAGCTC           |
| Kras rv      | AGCTAGCCACCATGGCTTGAGTAAGTCTGCA  |
| Pdx-1-Cre fw | ATGCTTCTGTCCGTTTGCCG             |
| Pdx-1-Cre rv | TGAGTGAACGAACCTGGTGC             |

## Supplementary table 2

List of the RNA processing genes analyzed in this study

|           |         |           |          |
|-----------|---------|-----------|----------|
| ACIN1     | IGF2BP2 | RBM23     | SFRS18   |
| AKAP17A   | IGF2BP3 | RBM24     | SFRS2IP  |
| BCLAF1    | KHDRBS1 | RBM25     | SFRS8    |
| CDC5L     | KHDRBS2 | RBM26     | SMN1     |
| CDK12     | KHDRBS3 | RBM27     | SNRNP70  |
| CDK13     | KHSRP   | RBM28     | SON      |
| CDK7      | LIN28A  | RBM3      | SR140    |
| CDK9      | LIN28B  | RBM33     | SREK1    |
| CELF1     | MBNL1   | RBM34     | SREK1IP1 |
| CELF2     | MBNL2   | RBM38     | SRP54    |
| CELF3     | MBNL3   | RBM39     | SRPK1    |
| CELF4     | MEX3A   | RBM4      | SRPK2    |
| CELF5     | MEX3B   | RBM41     | SRPK3    |
| CELF6     | MEX3C   | RBM42     | SRRM1    |
| CLASRP    | MEX3D   | RBM45     | SRRM2    |
| CLK1      | MSI1    | RBM46     | SRRM3    |
| CLK2      | NEK2    | RBM47     | SRRM4    |
| CLK3      | NONO    | RBM4B     | SRSF1    |
| CLK4      | NOVA1   | RBM5      | SRSF10   |
| DAZAP1    | NOVA2   | RBM6      | SRSF11   |
| ELAVL1    | PARP1   | RBM7      | SRSF12   |
| ELAVL2    | PCBP1   | RBM8A     | SRSF2    |
| ELAVL3    | PCBP2   | RBMS1     | SRSF3    |
| ELAVL4    | PCBP3   | RBMS2     | SRSF4    |
| ESRP1     | PCBP4   | RBMS3     | SRSF5    |
| ESRP2     | PNISR   | RBMX      | SRSF6    |
| EWSR1     | PTBP1   | RBMX2     | SRSF7    |
| FMR1      | PTBP2   | RBMXL1    | SRSF8    |
| FUS       | PUF60   | RBMX1A1   | SRSF9    |
| HNRNPA0   | PUM1    | RBMX1B    | SUGP2    |
| HNRNPA1   | PUM2    | RBMX1D    | SYNCRIP  |
| HNRNPA1L2 | QKI     | RBMX1E    | TAF15    |
| HNRNPA2B1 | RALY    | RBMX1F    | TARDBP   |
| HNRNPA3   | RALYL   | RBMX1J    | TIA1     |
| HNRNPAB   | RAVER1  | RBPMS     | TIAL1    |
| HNRNPC    | RAVER2  | RBPMS2    | TRA2A    |
| HNRNPCL1  | RBFOX1  | SAFB      | TRA2B    |
| HNRNPD    | RBFOX2  | SAFB2     | U2AF1    |
| HNRNPDL   | RBFOX3  | SCAF11    | U2AF2    |
| HNRNPF    | RBM10   | SCAF4     | U2SURP   |
| HNRNPH1   | RBM11   | SCAF8     | YBX1     |
| HNRNPH2   | RBM12   | SF1       | YBX2     |
| HNRNPH3   | RBM12B  | SF3B1     | YTHDC1   |
| HNRNPK    | RBM14   | SF3B5     | YTHDC2   |
| HNRNPL    | RBM15   | SFPQ      | ZC3H10   |
| HNRNPLL   | RBM15B  | SFRS12    | ZC3H13   |
| HNRNPM    | RBM16   | SFRS12IP1 | ZC3H14   |
| HNRNPR    | RBM17   | SFRS14    | ZC3H15   |
| HNRNPU    | RBM19   | SFRS15    | ZC3H8    |
| HNRNPUL1  | RBM20   | SFRS16    | ZRSR1    |
| HNRNPUL2  | RBM22   | SFRS17A   | ZRSR2    |

Supplementary table 3.

List of genes regulated in MEX3A-depleted cells.

| gene     | Fold change<br>(siCTRL vs<br>siMEX3A-sp) | p value     |  | gene      | Fold change<br>(siCTRL vs<br>siMEX3A-sp) | p value     |      |
|----------|------------------------------------------|-------------|--|-----------|------------------------------------------|-------------|------|
| MEX3A    | 65,61452663                              | 1,55277E-13 |  | HMOX1     | 149,6235656                              | 6,26405E-34 | down |
| ALDH1A3  | 51,40436516                              | 2,24842E-32 |  | LHX1      | 26,79168325                              | 2,24842E-32 | up   |
| MAP4K5   | 36,98281798                              | 3,32636E-20 |  | RP11-284F | 15,73982864                              | 9,33422E-10 |      |
| MCFD2    | 27,9898132                               | 1,51781E-32 |  | TXNIP     | 14,52111618                              | 1,20956E-16 |      |
| YIF1B    | 26,6072506                               | 5,35447E-08 |  | LINC00152 | 13,30454418                              | 6,98225E-16 |      |
| SYNJ2BP  | 26,0615355                               | 2,19096E-15 |  | SESN2     | 13,21295634                              | 2,86055E-12 |      |
| AP1S2    | 23,60478233                              | 1,82989E-12 |  | HBEGF     | 10,51961874                              | 6,81172E-06 |      |
| OTUD6B   | 23,33458062                              | 4,93323E-15 |  | GADD45A   | 10,25651926                              | 1,72523E-13 |      |
| TAF2     | 22,69864852                              | 7,39078E-14 |  | BLOC1S2   | 9,81747943                               | 8,75552E-09 |      |
| NFIB     | 22,49054606                              | 1,34458E-12 |  | RNF24     | 9,462371614                              | 6,21129E-06 |      |
| USP12    | 22,23309891                              | 3,61193E-16 |  | FHOD1     | 9,036494737                              | 3,80032E-06 |      |
| TMEM30A  | 21,18361135                              | 3,25967E-16 |  | BLVRB     | 8,912509381                              | 4,74134E-09 |      |
| STX2     | 21,0377844                               | 6,8375E-11  |  | SAT1      | 8,912509381                              | 1,40371E-11 |      |
| PLAU     | 21,0377844                               | 3,4107E-06  |  | EGR1      | 8,729713684                              | 2,33236E-12 |      |
| ZNF511   | 20,65380156                              | 5,33152E-12 |  | CAMK2G    | 8,550667129                              | 1,48657E-09 |      |
| ATP6V1A  | 20,46444637                              | 2,57668E-16 |  | ZFP36L1   | 8,356030182                              | 1,0762E-09  |      |
| TAF1B    | 20,18366364                              | 3,46965E-08 |  | FAM222B   | 8,14704284                               | 4,65806E-08 |      |
| CCDC68   | 18,7068214                               | 9,28765E-20 |  | TBC1D13   | 7,691304403                              | 1,26483E-06 |      |
| ZNF618   | 18,62087137                              | 0,000302043 |  | AP5Z1     | 7,691304403                              | 7,42973E-05 |      |
| ANTXR2   | 18,28100216                              | 2,19096E-15 |  | CAMTA2    | 7,413102413                              | 0,00053025  |      |
| PSMD6    | 17,25837892                              | 2,90688E-09 |  | SERPINB9  | 7,261059574                              | 9,84388E-06 |      |
| PPP2CB   | 16,82674061                              | 1,37987E-14 |  | MIR4435-2 | 7,261059574                              | 2,45278E-09 |      |
| ARPC1A   | 16,67247213                              | 7,68918E-17 |  | QPRT      | 7,227698036                              | 3,38992E-07 |      |
| ARSK     | 15,6675107                               | 1,07589E-10 |  | PPP1R15A  | 6,902398038                              | 1,28426E-06 |      |
| GLO1     | 15,31087462                              | 1,42979E-16 |  | ASNS      | 6,760829754                              | 0,000113878 |      |
| ALDH9A1  | 14,19057522                              | 9,22103E-15 |  | SLC1A5    | 6,714288529                              | 0,003551417 |      |
| BTBD10   | 13,89952631                              | 4,12739E-09 |  | SQSTM1    | 6,280583588                              | 7,13158E-05 |      |
| TXNDC12  | 13,39676687                              | 3,13014E-14 |  | JOSD2     | 5,701642723                              | 0,011821907 |      |
| TMED5    | 13,30454418                              | 2,501E-12   |  | PSMC4     | 5,61047976                               | 0,00020949  |      |
| GPBP1L1  | 12,76438809                              | 1,83877E-12 |  | PDLIM4    | 5,597576015                              | 0,001680109 |      |
| FAM73A   | 12,41652308                              | 5,63958E-09 |  | ZNF346    | 5,584701947                              | 0,003286808 |      |
| TDG      | 12,35947433                              | 2,96109E-05 |  | UBC       | 5,395106225                              | 1,10933E-08 |      |
| XRCC6BP1 | 12,0503594                               | 2,30601E-05 |  | ANKRD52   | 5,357966575                              | 0,00176051  |      |
| ZNF146   | 11,24604974                              | 0,000102116 |  | DPCD      | 5,308844442                              | 3,75283E-05 |      |
| BROX     | 10,93956366                              | 1,56648E-06 |  | CBR3      | 5,284452518                              | 7,86554E-05 |      |
| WDR36    | 10,88930093                              | 2,54533E-08 |  | RP11-445F | 5,272298614                              | 0,001506442 |      |
| PRNP     | 10,71519305                              | 1,39498E-12 |  | ZNFX1     | 5,069907083                              | 1,90307E-05 |      |
| MAP2K4   | 10,61695557                              | 5,69056E-07 |  | GLRX2     | 5,035006088                              | 0,00054515  |      |
| PLAC8    | 10,54386896                              | 2,10709E-05 |  | LGALS8    | 4,954501908                              | 0,000130181 |      |
| RNF182   | 10,51961874                              | 1,195E-12   |  | KATNB1    | 4,886523593                              | 0,001106502 |      |
| EDEM3    | 10,32761406                              | 3,38992E-07 |  | MAT2A     | 4,864072057                              | 0,020491716 |      |
| NAB1     | 10,23292992                              | 3,50407E-07 |  | ATP6V0A1  | 4,841723676                              | 0,000103652 |      |
| DHX33    | 10,0461579                               | 5,82119E-10 |  | KLHL21    | 4,764309868                              | 0,000456076 |      |
| SPAST    | 9,727472238                              | 4,30733E-06 |  | RAB11FIP5 | 4,742419853                              | 0,0124503   |      |



|              |             |             |  |           |             |             |  |
|--------------|-------------|-------------|--|-----------|-------------|-------------|--|
| DDX21        | 9,638290236 | 3,52001E-22 |  | R3HDM4    | 4,742419853 | 0,000141614 |  |
| AFAP1        | 9,616122784 | 7,86494E-08 |  | PSMD14    | 4,709773264 | 0,000838916 |  |
| FBXW11       | 9,571940713 | 1,04092E-05 |  | TOLLIP    | 4,698941086 | 0,000526309 |  |
| CSDE1        | 9,54992586  | 2,09273E-21 |  | MED31     | 4,666593803 | 4,80528E-05 |  |
| MYBL1        | 9,462371614 | 4,91599E-11 |  | ATG2A     | 4,591980128 | 0,001582662 |  |
| TERC         | 9,397233106 | 5,26594E-08 |  | LMLN      | 4,591980128 | 0,000260272 |  |
| RP11-582E3.6 | 9,397233106 | 1,15865E-05 |  | SLC2A3    | 4,518559444 | 0,00018442  |  |
| ADCK2        | 9,375620069 | 6,21129E-06 |  | NFKBIB    | 4,466835922 | 0,01736279  |  |
| CISD2        | 8,953647655 | 1,83269E-06 |  | MAFG      | 4,436086439 | 0,002929016 |  |
| PDHX         | 8,590135215 | 1,57126E-09 |  | OSER1     | 4,415704474 | 0,010177388 |  |
| TULP3        | 8,433347578 | 3,46965E-08 |  | PFN2      | 4,405548635 | 1,26897E-05 |  |
| IPO8         | 8,433347578 | 1,3936E-11  |  | EMC3      | 4,385306978 | 7,59149E-05 |  |
| SRGAP2C      | 8,222426499 | 7,59149E-05 |  | SLC3A2    | 4,385306978 | 9,18989E-05 |  |
| C5orf24      | 8,109610579 | 1,521E-07   |  | DOT1L     | 4,305266105 | 0,002664272 |  |
| STXBP5       | 8,053784412 | 4,92336E-05 |  | TRIAP1    | 4,295364268 | 0,003393131 |  |
| YWHAZ        | 7,925013305 | 5,32152E-10 |  | STK40     | 4,275628862 | 0,000208276 |  |
| AEBP2        | 7,90678628  | 2,25622E-05 |  | PPP2R1B   | 4,265795188 | 0,00021539  |  |
| UGCG         | 7,870457897 | 6,68225E-07 |  | ZRSR2     | 4,226686143 | 0,001194195 |  |
| PRKAR2B      | 7,852356346 | 3,69101E-06 |  | KLHDC10   | 4,216965034 | 0,001739538 |  |
| RIN2         | 7,6207901   | 6,40205E-07 |  | CD276     | 4,187935651 | 0,001506372 |  |
| BLOC1S6      | 7,603262769 | 7,27126E-08 |  | SNHG19    | 4,159106105 | 0,001358331 |  |
| BIRC2        | 7,498942093 | 1,41509E-11 |  | RHBDD2    | 4,120975191 | 0,003106456 |  |
| GPX8         | 7,430191379 | 1,89522E-05 |  | MKNK2     | 4,111497211 | 6,46834E-07 |  |
| TMED2        | 7,413102413 | 8,3423E-08  |  | MKKS      | 4,111497211 | 0,000996585 |  |
| LLPH         | 7,396052751 | 1,521E-07   |  | EVI5L     | 4,111497211 | 0,001174305 |  |
| GBAS         | 7,379042301 | 2,49173E-06 |  | HMGCS1    | 4,092606597 | 0,004722734 |  |
| PPFIBP2      | 7,345138682 | 0,000768801 |  | SWI5      | 4,073802778 | 0,025831715 |  |
| VANGL1       | 7,244359601 | 0,000173529 |  | AK5       | 4,055085354 | 0,001855626 |  |
| DENND5B      | 7,227698036 | 5,20735E-10 |  | TALDO1    | 4,055085354 | 0,000421005 |  |
| NDUFV2       | 7,144963261 | 9,95251E-12 |  | BAG3      | 4,008667176 | 0,000616441 |  |
| GSTCD        | 7,128530301 | 0,011661471 |  | CLIP4     | 3,999447498 | 0,009565814 |  |
| PSMA3-AS1    | 7,128530301 | 0,000476643 |  | STX1A     | 3,990249024 | 0,016002398 |  |
| MIB1         | 7,09577768  | 1,36959E-06 |  | WBP2      | 3,990249024 | 0,026907381 |  |
| PDCD4        | 7,04693069  | 2,9771E-05  |  | TFE3      | 3,917418771 | 4,9215E-05  |  |
| HELLS        | 6,902398038 | 1,02725E-08 |  | HTATIP2   | 3,917418771 | 0,001607799 |  |
| TRRAP        | 6,886522963 | 6,18834E-05 |  | TTC1      | 3,917418771 | 3,34526E-06 |  |
| SLC30A7      | 6,854882265 | 1,42645E-06 |  | CCDC174   | 3,908408958 | 0,000583854 |  |
| RBPJ         | 6,839116473 | 1,26551E-06 |  | DCP1A     | 3,899419867 | 0,010104591 |  |
| SECISBP2     | 6,745280277 | 2,45143E-06 |  | PLAUR     | 3,88150366  | 0,000673058 |  |
| PIIP5K2      | 6,729766563 | 8,28281E-08 |  | SS18L2    | 3,819442708 | 0,0320913   |  |
| NFKB1        | 6,714288529 | 0,002742588 |  | ANKRA2    | 3,801893963 | 0,008620287 |  |
| DAB2IP       | 6,668067692 | 0,000130181 |  | DUSP14    | 3,801893963 | 0,000799697 |  |
| BAG5         | 6,622165037 | 4,29499E-07 |  | ATP6V0E1  | 3,784425847 | 5,98248E-05 |  |
| AGL          | 6,60693448  | 0,000579895 |  | SLC7A5    | 3,775721909 | 8,21203E-05 |  |
| CTDSPL2      | 6,546361741 | 1,64299E-07 |  | DAGLB     | 3,715352291 | 0,046621873 |  |
| ME2          | 6,516283941 | 6,59372E-06 |  | AEN       | 3,715352291 | 0,019995136 |  |
| SSX2IP       | 6,441692655 | 7,45382E-06 |  | PPP1R26-A | 3,706807218 | 0,022686657 |  |
| NAA20        | 6,412095766 | 0,009983713 |  | SNHG9     | 3,706807218 | 0,000878544 |  |
| DNAJC16      | 6,367955209 | 4,9215E-05  |  | FBXO30    | 3,672823005 | 0,005632315 |  |
| HABP4        | 6,338697113 | 2,99573E-05 |  | MPHOSPH   | 3,655947916 | 0,000774055 |  |

|           |             |             |  |          |             |             |  |
|-----------|-------------|-------------|--|----------|-------------|-------------|--|
| HIST1H2BF | 6,338697113 | 0,013542537 |  | ZNF367   | 3,630780548 | 0,010341364 |  |
| PSMD10    | 6,324118514 | 0,000104525 |  | MINK1    | 3,580964371 | 0,032526281 |  |
| EMP1      | 6,309573445 | 1,28441E-11 |  | AIFM2    | 3,572728382 | 0,000329781 |  |
| SLC5A3    | 6,295061829 | 1,64499E-08 |  | ZFAND5   | 3,564511334 | 0,002692843 |  |
| RRN3      | 6,280583588 | 0,000151302 |  | DVL3     | 3,539973411 | 0,006306374 |  |
| HIST1H1D  | 6,266138647 | 0,00074207  |  | C6orf1   | 3,539973411 | 0,015096852 |  |
| AK4       | 6,251726928 | 2,67979E-09 |  | GRAMD3   | 3,531831698 | 0,000248707 |  |
| C17orf58  | 6,251726928 | 0,001040075 |  | SYNJ1    | 3,531831698 | 0,004939027 |  |
| CCM2      | 6,165950019 | 3,79872E-06 |  | TOMM34   | 3,52370871  | 0,000130181 |  |
| MAP3K13   | 6,151768727 | 7,39871E-06 |  | NMRAL1   | 3,515604405 | 0,033285988 |  |
| BRI3BP    | 6,137620052 | 4,05336E-07 |  | WEE1     | 3,515604405 | 0,01210205  |  |
| PNMA2     | 6,081350013 | 0,0003438   |  | CEP170B  | 3,475361614 | 0,027193887 |  |
| LSM14B    | 6,011737375 | 0,0002555   |  | TMEM59   | 3,475361614 | 0,018097687 |  |
| TRIM25    | 5,970352866 | 3,51743E-07 |  | PDZD11   | 3,475361614 | 0,00015746  |  |
| TCF7      | 5,929253246 | 1,67333E-09 |  | MAX      | 3,443499308 | 0,046890311 |  |
| ORMDL1    | 5,929253246 | 4,85428E-06 |  | SIRT7    | 3,427677865 | 0,004450163 |  |
| POLR3K    | 5,821032178 | 0,001052175 |  | EIF3J    | 3,396252726 | 4,91825E-06 |  |
| NOL9      | 5,807644175 | 2,0481E-05  |  | PUS3     | 3,396252726 | 0,026151189 |  |
| TAF8      | 5,794286964 | 5,84644E-05 |  | FBXW7    | 3,388441561 | 0,001201615 |  |
| VMA21     | 5,780960474 | 3,42801E-06 |  | PSMD13   | 3,380648362 | 0,001358331 |  |
| TM4SF18   | 5,780960474 | 3,2199E-06  |  | LIMK1    | 3,3419504   | 0,032512552 |  |
| RBM41     | 5,754399373 | 0,001896441 |  | KIAA1143 | 3,3419504   | 0,013452269 |  |
| MRGBP     | 5,72796031  | 2,27092E-06 |  | WIZ      | 3,318944576 | 0,012284543 |  |
| PPP2R5A   | 5,714786367 | 3,52961E-05 |  | SERPINB8 | 3,296097122 | 0,021065915 |  |
| CD46      | 5,688529308 | 7,92319E-06 |  | TLL4     | 3,265878322 | 0,033636494 |  |
| MAD2L1    | 5,597576015 | 0,004390802 |  | ERI3     | 3,221068791 | 0,045661576 |  |
| SUCO      | 5,571857489 | 0,000309568 |  | BTG1     | 3,221068791 | 0,013312245 |  |
| LAMP2     | 5,508076964 | 7,86554E-05 |  | TRIM11   | 3,221068791 | 0,007337241 |  |
| JADE1     | 5,495408739 | 6,9828E-06  |  | PSMD11   | 3,191537855 | 0,032930546 |  |
| GNPTAB    | 5,495408739 | 0,000700095 |  | CSK      | 3,184197522 | 0,038705509 |  |
| KATNBL1   | 5,432503315 | 0,002692843 |  | CCDC34   | 3,184197522 | 0,01131695  |  |
| ATP2B4    | 5,420008904 | 1,10933E-08 |  | ABCC5    | 3,16227766  | 0,045757422 |  |
| ECT2      | 5,420008904 | 1,28098E-05 |  | UBXN4    | 3,16227766  | 0,000878544 |  |
| CAMKK2    | 5,407543229 | 0,001757264 |  | RGS3     | 3,155004623 | 0,012390112 |  |
| FAIM      | 5,407543229 | 0,007533654 |  | NSFL1C   | 3,140508694 | 0,000476643 |  |
| ESCO2     | 5,370317964 | 0,003318564 |  | JOSD1    | 3,133285724 | 0,009184612 |  |
| SENP5     | 5,357966575 | 0,001082528 |  | TMEM208  | 3,133285724 | 0,004170785 |  |
| STRN      | 5,321082593 | 0,000103785 |  | NT5C2    | 3,111716337 | 0,015179561 |  |
| FAM199X   | 5,321082593 | 0,001156594 |  | TMEM170  | 3,111716337 | 0,013680938 |  |
| EPT1      | 5,321082593 | 0,001506648 |  | FAM98A   | 3,104559588 | 0,003286808 |  |
| IPO7      | 5,321082593 | 1,0989E-08  |  | HAUS8    | 3,104559588 | 0,012538375 |  |
| SPCS3     | 5,272298614 | 0,000732874 |  | NPLOC4   | 3,104559588 | 0,000798884 |  |
| RHOT1     | 5,260172664 | 0,007284705 |  | TSR3     | 3,054921113 | 0,010004727 |  |
| NCOA3     | 5,248074602 | 0,000943677 |  | BCAP31   | 3,054921113 | 0,037944869 |  |
| UBA6      | 5,22396189  | 0,000279307 |  | PSMD3    | 3,040885026 | 0,022951973 |  |
| YES1      | 5,211947111 | 3,60452E-09 |  | DAP3     | 3,040885026 | 0,000568237 |  |
| UBE2E3    | 5,188000389 | 8,66322E-06 |  | ATP6V1B2 | 3,033891184 | 0,047744857 |  |
| SLC39A10  | 5,17606832  | 2,49173E-06 |  | SH3BGR13 | 3,026913428 | 0,003560253 |  |
| CALU      | 5,164163693 | 1,26551E-06 |  | RNF181   | 3,026913428 | 0,014766728 |  |
| ELOVL5    | 5,140436516 | 6,74847E-05 |  | BAK1     | 3,006076303 | 0,014124291 |  |

|           |             |             |  |          |             |             |  |
|-----------|-------------|-------------|--|----------|-------------|-------------|--|
| HIPK1     | 5,140436516 | 0,001855626 |  | CLU      | 3,006076303 | 0,000747794 |  |
| CCDC43    | 5,140436516 | 2,49173E-06 |  | AKIRIN2  | 2,985382619 | 0,046710726 |  |
| AGPAT3    | 5,116818355 | 8,50321E-05 |  | TRIM38   | 2,951209227 | 0,031645786 |  |
| FAM208A   | 5,081594426 | 0,000107671 |  | KLC1     | 2,937649652 | 0,041901934 |  |
| ZNF714    | 5,046612976 | 0,003963984 |  | C9orf142 | 2,910717118 | 0,013250016 |  |
| PAQR4     | 5,035006088 | 0,007337241 |  | PSAP     | 2,877398415 | 0,003539324 |  |
| CDC42SE1  | 5,00034535  | 0,01959414  |  | GRIPAP1  | 2,870780582 | 0,00340261  |  |
| SEH1L     | 4,97737085  | 0,015811054 |  | PGD      | 2,870780582 | 0,023595852 |  |
| SMCHD1    | 4,94310687  | 2,30667E-05 |  | ARF4     | 2,857590543 | 0,030596929 |  |
| ITGB4     | 4,94310687  | 3,18279E-07 |  | STX4     | 2,844461107 | 0,01260166  |  |
| C2orf69   | 4,93173804  | 6,81373E-07 |  | UBE2O    | 2,837919028 | 0,016064306 |  |
| CMTM7     | 4,920395357 | 2,49976E-06 |  | TAF1C    | 2,805433638 | 0,030865523 |  |
| R3HDM2    | 4,920395357 | 0,001095537 |  | CHORDC1  | 2,805433638 | 0,009207028 |  |
| YAP1      | 4,886523593 | 0,001651322 |  | CBX6     | 2,79898132  | 0,017289185 |  |
| LMO4      | 4,864072057 | 0,012115984 |  | BLMH     | 2,786121169 | 0,017027481 |  |
| RPL41     | 4,864072057 | 0,032634525 |  | ATP6V0D1 | 2,786121169 | 0,013267123 |  |
| HEXIM1    | 4,83058802  | 3,50554E-06 |  | ATP5L    | 2,786121169 | 0,028384976 |  |
| TBL1XR1   | 4,797334486 | 6,85661E-05 |  | ZNF579   | 2,773320105 | 0,032664599 |  |
| ENTPD4    | 4,73151259  | 0,000514452 |  | GSTP1    | 2,766941645 | 0,030482755 |  |
| RC3H2     | 4,720630413 | 6,08577E-05 |  | KIAA1715 | 2,766941645 | 0,033253695 |  |
| HMG2      | 4,698941086 | 0,000208276 |  | IGF2BP3  | 2,760577856 | 0,002079115 |  |
| BLM       | 4,677351413 | 0,010350611 |  | DHCR24   | 2,747894153 | 0,012658838 |  |
| CFD       | 4,677351413 | 0,001384779 |  | PPP1R18  | 2,741574172 | 0,010760314 |  |
| FEM1A     | 4,666593803 | 6,00064E-05 |  | CAMLG    | 2,741574172 | 0,000921511 |  |
| ADAM10    | 4,645152752 | 4,80528E-05 |  | RNF10    | 2,716439269 | 0,030322133 |  |
| TEAD2     | 4,634469197 | 0,028682079 |  | NDST1    | 2,716439269 | 0,024365397 |  |
| PHACTR2   | 4,613175746 | 0,004722734 |  | SELK     | 2,716439269 | 0,017027481 |  |
| FAM35A    | 4,613175746 | 0,003215856 |  | GSTO1    | 2,716439269 | 0,014747918 |  |
| DTL       | 4,602565736 | 5,08571E-05 |  | TNFRSF1A | 2,703958364 | 0,000414219 |  |
| CDCA7     | 4,591980128 | 0,001954423 |  | IER3IP1  | 2,703958364 | 0,030297045 |  |
| EXTL2     | 4,570881896 | 0,001229783 |  | GNPDA1   | 2,691534804 | 0,005165533 |  |
| CYP27C1   | 4,539416167 | 0,000798884 |  | PLPP1    | 2,685344446 | 0,022751581 |  |
| FBXO27    | 4,518559444 | 0,007261139 |  | STK17A   | 2,685344446 | 0,006695908 |  |
| ZNF580    | 4,508167045 | 0,030865523 |  | PSMB1    | 2,673006409 | 0,033636494 |  |
| LINC00657 | 4,477133042 | 9,19848E-06 |  | PSME4    | 2,673006409 | 0,007473006 |  |
| RAB22A    | 4,466835922 | 7,63925E-05 |  | PSMB6    | 2,673006409 | 0,001936365 |  |
| SEPT10    | 4,456562484 | 5,59445E-05 |  | USP14    | 2,654605562 | 0,000700095 |  |
| CAV2      | 4,436086439 | 6,46834E-07 |  | DNTTIP1  | 2,630267992 | 0,030677975 |  |
| CREBL2    | 4,436086439 | 6,31595E-05 |  | USP36    | 2,624218543 | 0,022631579 |  |
| EXOC5     | 4,425883724 | 0,006535215 |  | SHC1     | 2,624218543 | 0,002633283 |  |
| MZT1      | 4,425883724 | 0,00206274  |  | ACAT2    | 2,618183008 | 0,022751581 |  |
| SLC35F2   | 4,375221052 | 0,000273894 |  | TCEA2    | 2,618183008 | 0,045931743 |  |
| RREB1     | 4,375221052 | 0,004494523 |  | MED15    | 2,600159563 | 0,019839624 |  |
| KIF3A     | 4,375221052 | 0,001019553 |  | HMGA1    | 2,600159563 | 0,004583565 |  |
| MAT2B     | 4,355118737 | 0,00910443  |  | ELP5     | 2,594179362 | 0,0320913   |  |
| TMPO      | 4,305266105 | 5,69056E-07 |  | TWF2     | 2,594179362 | 0,023506929 |  |
| SPIN1     | 4,295364268 | 0,00075023  |  | KPNA1    | 2,588212915 | 0,024336804 |  |
| RNF149    | 4,295364268 | 0,004427804 |  | LASP1    | 2,576321157 | 0,027320925 |  |
| FAM168B   | 4,285485204 | 0,001905688 |  | UBR4     | 2,576321157 | 0,036396688 |  |
| CCDC112   | 4,265795188 | 0,007014009 |  | UFD1L    | 2,570395783 | 0,003281905 |  |

|           |             |             |  |          |             |             |  |
|-----------|-------------|-------------|--|----------|-------------|-------------|--|
| PIAS2     | 4,255984131 | 0,021270645 |  | SMIM4    | 2,564484037 | 0,045246961 |  |
| OGFRL1    | 4,255984131 | 0,001040075 |  | EIF1     | 2,558585887 | 0,001916414 |  |
| CLMN      | 4,255984131 | 0,039768522 |  | MSN      | 2,552701303 | 0,004007727 |  |
| OSBPL8    | 4,23642966  | 2,75769E-05 |  | JUN      | 2,552701303 | 0,001953072 |  |
| APOO      | 4,23642966  | 0,023426654 |  | SPATS2   | 2,546830253 | 0,048176744 |  |
| SMC2      | 4,226686143 | 8,3601E-05  |  | UBALD2   | 2,540972706 | 0,020699066 |  |
| HIST1H1C  | 4,226686143 | 0,026515095 |  | TAX1BP1  | 2,511886432 | 0,007124928 |  |
| SAP30     | 4,216965034 | 0,002143333 |  | FHL2     | 2,488857318 | 0,012115984 |  |
| KRT80     | 4,216965034 | 0,000476843 |  | RGS4     | 2,477422058 | 0,008483676 |  |
| SAPCD2    | 4,187935651 | 0,000108917 |  | POMP     | 2,460367604 | 0,033282756 |  |
| PUDP      | 4,168693835 | 0,011552585 |  | SLC25A37 | 2,454708916 | 0,019655623 |  |
| CLOCK     | 4,168693835 | 0,004057027 |  | CCDC186  | 2,437810818 | 0,009618    |  |
| DCBLD1    | 4,159106105 | 0,005306502 |  | SLC25A13 | 2,432204009 | 0,024791577 |  |
| FGFR1OP2  | 4,139996748 | 8,71441E-05 |  | LYPLA2   | 2,421029047 | 0,047930176 |  |
| PFAS      | 4,13047502  | 0,006664023 |  | UBE2A    | 2,409905429 | 0,046474756 |  |
| AAMP      | 4,120975191 | 0,001651322 |  | AHSA1    | 2,409905429 | 0,019331332 |  |
| FIGNL1    | 4,120975191 | 0,010278819 |  | NDUFA5   | 2,393315756 | 0,030482755 |  |
| SLC38A1   | 4,111497211 | 0,00010989  |  | LAPTM4A  | 2,382319469 | 0,027502498 |  |
| NLN       | 4,10204103  | 0,00035911  |  | PRDX5    | 2,376840287 | 0,02640027  |  |
| POGK      | 4,092606597 | 0,000475725 |  | KMT2C    | 2,355049284 | 0,03626595  |  |
| GENE      | 4,073802778 | 0,006002743 |  | PSMA2    | 2,344228815 | 0,032664599 |  |
| KLHL8     | 4,064433292 | 0,000217506 |  | WDR83OS  | 2,338837239 | 0,019584962 |  |
| AKAP12    | 4,027170343 | 0,003318564 |  | PPIF     | 2,338837239 | 0,04390072  |  |
| BOD1      | 4,027170343 | 0,002376355 |  | ERCC1    | 2,31739465  | 0,017903621 |  |
| SERTAD2   | 4,017908108 | 0,044603358 |  | STK4     | 2,31206479  | 0,016574635 |  |
| PTPRA     | 3,999447498 | 0,024663112 |  | KIF3B    | 2,31206479  | 0,036945648 |  |
| MPC1      | 3,990249024 | 0,01141245  |  | GPAT3    | 2,31206479  | 0,01498325  |  |
| LNPEP     | 3,990249024 | 0,011819278 |  | DYNC1H1  | 2,306747189 | 0,045246961 |  |
| TGFBR3    | 3,971915495 | 0,004939027 |  | PAIP2    | 2,285598803 | 0,039357076 |  |
| GSPT2     | 3,971915495 | 0,005118519 |  | POLE3    | 2,275097431 | 0,022751581 |  |
| ABHD10    | 3,962780343 | 0,000255662 |  | MAP3K3   | 2,269864852 | 0,035624881 |  |
| LIMA1     | 3,953666201 | 1,52254E-05 |  | MCL1     | 2,264644308 | 0,028218989 |  |
| APIP      | 3,944573021 | 0,014263845 |  | HGS      | 2,264644308 | 0,043233468 |  |
| CKB       | 3,935500755 | 0,022303243 |  | SAMD4B   | 2,202926463 | 0,025831715 |  |
| ANKRD50   | 3,926449354 | 0,000283771 |  | YWHAG    | 2,197859873 | 0,010375599 |  |
| CNOT3     | 3,917418771 | 0,027016387 |  | KCMF1    | 2,192804935 | 0,021336327 |  |
| PHF6      | 3,908408958 | 3,40181E-05 |  | ATOX1    | 2,182729912 | 0,027502498 |  |
| SEMA3C    | 3,899419867 | 0,000611853 |  | LRP10    | 2,162718524 | 0,017477911 |  |
| ID2       | 3,89045145  | 0,00074207  |  | PSMD4    | 2,157744409 | 0,042252616 |  |
| MAPK1IP1L | 3,89045145  | 0,000283771 |  | PSMB2    | 2,118361135 | 0,016587407 |  |
| SLC12A2   | 3,837072455 | 0,000617858 |  | KRT19    | 2,11348904  | 0,047930176 |  |
| PRKD3     | 3,828247433 | 0,001953913 |  | MAF1     | 2,11348904  | 0,022108766 |  |
| INIP      | 3,828247433 | 0,003103997 |  | PPP2CA   | 2,10862815  | 0,022108766 |  |
| ERLIN2    | 3,810658234 | 0,004950788 |  | PSMA7    | 2,084490883 | 0,044671032 |  |
| HINT3     | 3,79314985  | 0,019040726 |  | PCYT1A   | 2,065380156 | 0,029324802 |  |
| EIF4H     | 3,775721909 | 0,007124928 |  | TKT      | 2,055890596 | 0,04346265  |  |
| MFI2      | 3,775721909 | 0,019992654 |  | PSMD2    | 2,018366364 | 0,018488402 |  |
| DCP2      | 3,775721909 | 0,003591241 |  | SRPK2    | 2,004472027 | 0,047744857 |  |
| HCFC1R1   | 3,749730022 | 0,001896441 |  |          |             |             |  |
| PRR11     | 3,741105883 | 1,36959E-06 |  |          |             |             |  |

|          |             |             |  |  |  |  |  |
|----------|-------------|-------------|--|--|--|--|--|
| MPHOSPH9 | 3,723917063 | 0,004781289 |  |  |  |  |  |
| CDC27    | 3,706807218 | 0,000334963 |  |  |  |  |  |
| PANK3    | 3,672823005 | 0,000480646 |  |  |  |  |  |
| STARD7   | 3,664375746 | 0,000210564 |  |  |  |  |  |
| FAM101B  | 3,655947916 | 0,000100946 |  |  |  |  |  |
| MRPL16   | 3,647539469 | 0,000371201 |  |  |  |  |  |
| SPIRE1   | 3,630780548 | 0,001229783 |  |  |  |  |  |
| PDP2     | 3,630780548 | 0,000636953 |  |  |  |  |  |
| DEPDC1   | 3,622429984 | 0,012928711 |  |  |  |  |  |
| KCTD3    | 3,622429984 | 0,014124291 |  |  |  |  |  |
| PBRM1    | 3,589219346 | 0,001284167 |  |  |  |  |  |
| GK5      | 3,589219346 | 0,006382678 |  |  |  |  |  |
| ZMYM4    | 3,572728382 | 0,000421005 |  |  |  |  |  |
| HCG11    | 3,556313186 | 0,045246961 |  |  |  |  |  |
| METAP1   | 3,548133892 | 0,001506648 |  |  |  |  |  |
| TBX2     | 3,539973411 | 0,007570615 |  |  |  |  |  |
| DCAF10   | 3,515604405 | 2,33626E-05 |  |  |  |  |  |
| NT5E     | 3,515604405 | 2,05374E-05 |  |  |  |  |  |
| METTL13  | 3,49945167  | 0,000778611 |  |  |  |  |  |
| NEDD1    | 3,49945167  | 0,012284543 |  |  |  |  |  |
| PER3     | 3,475361614 | 0,047520703 |  |  |  |  |  |
| SFXN1    | 3,467368505 | 4,4356E-05  |  |  |  |  |  |
| SCAF11   | 3,459393778 | 9,85767E-05 |  |  |  |  |  |
| MYADM    | 3,435579479 | 3,47671E-05 |  |  |  |  |  |
| FKBP3    | 3,427677865 | 0,000422543 |  |  |  |  |  |
| FUBP3    | 3,411929116 | 0,000760339 |  |  |  |  |  |
| TMEM181  | 3,404081897 | 0,008258997 |  |  |  |  |  |
| BTN2A1   | 3,396252726 | 0,016587407 |  |  |  |  |  |
| FAM213A  | 3,372873087 | 0,016247991 |  |  |  |  |  |
| EREG     | 3,372873087 | 0,001311511 |  |  |  |  |  |
| CLPX     | 3,365115694 | 0,012115984 |  |  |  |  |  |
| SBNO1    | 3,357376142 | 4,36465E-05 |  |  |  |  |  |
| MRPL48   | 3,357376142 | 0,004497354 |  |  |  |  |  |
| MGAT5    | 3,349654392 | 0,034417351 |  |  |  |  |  |
| ING2     | 3,349654392 | 0,010627931 |  |  |  |  |  |
| UBXN2A   | 3,334264128 | 0,005586382 |  |  |  |  |  |
| ARHGEF12 | 3,318944576 | 0,005115671 |  |  |  |  |  |
| CREB1    | 3,311311215 | 0,003591241 |  |  |  |  |  |
| HS2ST1   | 3,311311215 | 0,038944335 |  |  |  |  |  |
| PTPN1    | 3,311311215 | 0,000110656 |  |  |  |  |  |
| NUP58    | 3,288516309 | 0,000273894 |  |  |  |  |  |
| FAM20B   | 3,280952931 | 0,015577459 |  |  |  |  |  |
| SWAP70   | 3,280952931 | 0,000557915 |  |  |  |  |  |
| SAMD1    | 3,265878322 | 0,002978457 |  |  |  |  |  |
| ETV6     | 3,25836701  | 0,016247991 |  |  |  |  |  |
| PPM1B    | 3,250872974 | 0,036288323 |  |  |  |  |  |
| LRRFIP1  | 3,235936569 | 7,7924E-05  |  |  |  |  |  |
| FGFR1OP  | 3,235936569 | 0,018720136 |  |  |  |  |  |
| EIF4A1   | 3,221068791 | 5,94701E-05 |  |  |  |  |  |
| TOR1AIP2 | 3,206269325 | 5,57222E-05 |  |  |  |  |  |

|          |             |             |  |  |  |  |  |
|----------|-------------|-------------|--|--|--|--|--|
| RBL1     | 3,19889511  | 0,01912525  |  |  |  |  |  |
| PNN      | 3,19889511  | 0,003439524 |  |  |  |  |  |
| IARS2    | 3,191537855 | 0,001388932 |  |  |  |  |  |
| UBE3B    | 3,184197522 | 0,032930546 |  |  |  |  |  |
| RSBN1    | 3,16227766  | 0,018097687 |  |  |  |  |  |
| RBM28    | 3,16227766  | 0,000182927 |  |  |  |  |  |
| FBXO33   | 3,155004623 | 0,028795461 |  |  |  |  |  |
| KLHL23   | 3,155004623 | 0,010375599 |  |  |  |  |  |
| CHD5     | 3,147748314 | 0,011199823 |  |  |  |  |  |
| BRWD1    | 3,147748314 | 0,011552585 |  |  |  |  |  |
| PHF20L1  | 3,133285724 | 0,000985222 |  |  |  |  |  |
| KEAP1    | 3,11889584  | 0,030596929 |  |  |  |  |  |
| FURIN    | 3,111716337 | 0,047960665 |  |  |  |  |  |
| TNRC6B   | 3,104559588 | 0,000450782 |  |  |  |  |  |
| PTBP3    | 3,104559588 | 0,001229783 |  |  |  |  |  |
| PDCL3    | 3,097419299 | 0,017679091 |  |  |  |  |  |
| PHF10    | 3,097419299 | 0,016587407 |  |  |  |  |  |
| MIEN1    | 3,097419299 | 0,00705872  |  |  |  |  |  |
| HNRNPLL  | 3,08318795  | 0,040518669 |  |  |  |  |  |
| EI24     | 3,08318795  | 0,006241912 |  |  |  |  |  |
| RRM2     | 3,08318795  | 0,001229783 |  |  |  |  |  |
| ATP1B1   | 3,069021988 | 0,004722734 |  |  |  |  |  |
| CSNK1G3  | 3,069021988 | 0,019168384 |  |  |  |  |  |
| VPS36    | 3,061963434 | 0,015577459 |  |  |  |  |  |
| TMEM214  | 3,054921113 | 0,043173316 |  |  |  |  |  |
| FAR1     | 3,04789499  | 0,013095356 |  |  |  |  |  |
| FERMT1   | 3,040885026 | 0,003014119 |  |  |  |  |  |
| KIF14    | 3,040885026 | 0,00804679  |  |  |  |  |  |
| REEP5    | 3,033891184 | 0,006953093 |  |  |  |  |  |
| HNRNPR   | 3,026913428 | 0,001506648 |  |  |  |  |  |
| C11orf24 | 3,026913428 | 0,033954105 |  |  |  |  |  |
| OSBPL3   | 3,01995172  | 0,013726027 |  |  |  |  |  |
| ERCC3    | 3,01995172  | 0,039768522 |  |  |  |  |  |
| ZBTB18   | 3,01995172  | 0,013150844 |  |  |  |  |  |
| MT1A     | 3,01995172  | 0,038982563 |  |  |  |  |  |
| PEG10    | 3,013006024 | 0,020551162 |  |  |  |  |  |
| AMOTL2   | 3,006076303 | 0,004095028 |  |  |  |  |  |
| NCAPH    | 2,999162519 | 0,01498325  |  |  |  |  |  |
| WWC2     | 2,999162519 | 0,001885786 |  |  |  |  |  |
| SNHG12   | 2,992264637 | 0,027823085 |  |  |  |  |  |
| KAT6B    | 2,985382619 | 0,012904838 |  |  |  |  |  |
| LRRC58   | 2,985382619 | 9,44891E-05 |  |  |  |  |  |
| SMC1A    | 2,978516429 | 0,010235547 |  |  |  |  |  |
| PDCD2    | 2,971666032 | 0,006109367 |  |  |  |  |  |
| CCDC50   | 2,971666032 | 0,001910821 |  |  |  |  |  |
| MAGT1    | 2,96483139  | 0,030322133 |  |  |  |  |  |
| HDAC8    | 2,96483139  | 0,010054814 |  |  |  |  |  |
| MRPL19   | 2,951209227 | 0,047030571 |  |  |  |  |  |
| ADNP     | 2,944421634 | 0,022384224 |  |  |  |  |  |
| QKI      | 2,944421634 | 0,00021539  |  |  |  |  |  |

|          |             |             |  |  |  |  |
|----------|-------------|-------------|--|--|--|--|
| ARHGAP12 | 2,944421634 | 0,03604242  |  |  |  |  |
| CAND1    | 2,937649652 | 0,004915575 |  |  |  |  |
| TYMS     | 2,937649652 | 0,000811396 |  |  |  |  |
| ZNF638   | 2,924152378 | 0,007337241 |  |  |  |  |
| SPAG5    | 2,917427014 | 0,01141245  |  |  |  |  |
| RAP2B    | 2,917427014 | 0,009176136 |  |  |  |  |
| PTGR1    | 2,910717118 | 0,038561386 |  |  |  |  |
| COQ10B   | 2,910717118 | 0,041901934 |  |  |  |  |
| THOC7    | 2,910717118 | 0,01078239  |  |  |  |  |
| HIP1     | 2,890679882 | 0,006671327 |  |  |  |  |
| TIPRL    | 2,890679882 | 0,010684814 |  |  |  |  |
| BICD2    | 2,890679882 | 0,011083412 |  |  |  |  |
| MCM10    | 2,870780582 | 0,00130732  |  |  |  |  |
| SNX13    | 2,857590543 | 0,021989086 |  |  |  |  |
| GJC1     | 2,857590543 | 0,008995433 |  |  |  |  |
| USP13    | 2,851018268 | 0,003878459 |  |  |  |  |
| RAB17    | 2,851018268 | 0,033782865 |  |  |  |  |
| UQCC2    | 2,851018268 | 0,017244956 |  |  |  |  |
| GCLM     | 2,844461107 | 0,001201615 |  |  |  |  |
| MED1     | 2,844461107 | 0,000195961 |  |  |  |  |
| G2E3     | 2,824879975 | 0,026443518 |  |  |  |  |
| TNNT1    | 2,824879975 | 0,023595852 |  |  |  |  |
| PPP1R12C | 2,818382931 | 0,028795461 |  |  |  |  |
| VAR2     | 2,818382931 | 0,033686139 |  |  |  |  |
| SLC39A6  | 2,81190083  | 0,014151282 |  |  |  |  |
| CRIM1    | 2,805433638 | 0,021082071 |  |  |  |  |
| ZC3H14   | 2,792543841 | 0,030482755 |  |  |  |  |
| CENPH    | 2,792543841 | 0,047195229 |  |  |  |  |
| FUT11    | 2,779713268 | 0,02960336  |  |  |  |  |
| RAD17    | 2,773320105 | 0,049243383 |  |  |  |  |
| SP3      | 2,773320105 | 0,047744857 |  |  |  |  |
| MBTPS2   | 2,766941645 | 0,012981844 |  |  |  |  |
| CELF1    | 2,766941645 | 0,0001573   |  |  |  |  |
| FKBP14   | 2,760577856 | 0,023861576 |  |  |  |  |
| CALR     | 2,760577856 | 0,001793795 |  |  |  |  |
| FAM107B  | 2,754228703 | 0,038944335 |  |  |  |  |
| ROCK1    | 2,754228703 | 0,001409248 |  |  |  |  |
| WDR12    | 2,754228703 | 0,008751097 |  |  |  |  |
| MRE11A   | 2,747894153 | 0,024501598 |  |  |  |  |
| DGKD     | 2,747894153 | 0,01896888  |  |  |  |  |
| PCNX     | 2,747894153 | 0,037344055 |  |  |  |  |
| MYH10    | 2,722701308 | 0,005951139 |  |  |  |  |
| UGP2     | 2,710191632 | 0,01959414  |  |  |  |  |
| CYP20A1  | 2,703958364 | 0,00917966  |  |  |  |  |
| DGKE     | 2,703958364 | 0,030141878 |  |  |  |  |
| CBX1     | 2,697739432 | 0,008906323 |  |  |  |  |
| TBRG4    | 2,697739432 | 0,005917393 |  |  |  |  |
| PMEPA1   | 2,691534804 | 0,008420826 |  |  |  |  |
| AKAP1    | 2,685344446 | 0,02864504  |  |  |  |  |
| TGOLN2   | 2,666858665 | 0,000799697 |  |  |  |  |

|          |             |             |  |  |  |  |  |
|----------|-------------|-------------|--|--|--|--|--|
| RAB8A    | 2,66072506  | 0,003177266 |  |  |  |  |  |
| ERLEC1   | 2,648500139 | 0,04346265  |  |  |  |  |  |
| DVL1     | 2,648500139 | 0,013175229 |  |  |  |  |  |
| RNF20    | 2,648500139 | 0,013550784 |  |  |  |  |  |
| SNRNP25  | 2,642408757 | 0,035012183 |  |  |  |  |  |
| ACSL3    | 2,636331386 | 0,004583565 |  |  |  |  |  |
| DEK      | 2,630267992 | 0,005274827 |  |  |  |  |  |
| NOM1     | 2,588212915 | 0,007451789 |  |  |  |  |  |
| ZBTB38   | 2,576321157 | 0,008432684 |  |  |  |  |  |
| MYO18A   | 2,570395783 | 0,03604242  |  |  |  |  |  |
| CAMSAP2  | 2,564484037 | 0,008818754 |  |  |  |  |  |
| FLII     | 2,564484037 | 0,047897761 |  |  |  |  |  |
| UBLCP1   | 2,552701303 | 0,039212605 |  |  |  |  |  |
| EPB41    | 2,546830253 | 0,020027338 |  |  |  |  |  |
| HECTD1   | 2,540972706 | 0,023506929 |  |  |  |  |  |
| CASC3    | 2,540972706 | 0,008765047 |  |  |  |  |  |
| HSPA4L   | 2,540972706 | 0,025983641 |  |  |  |  |  |
| GTF3C6   | 2,529297996 | 0,018585766 |  |  |  |  |  |
| RPL5     | 2,517676928 | 0,025026241 |  |  |  |  |  |
| GOLIM4   | 2,517676928 | 0,007930925 |  |  |  |  |  |
| SMAD2    | 2,506109253 | 0,020224648 |  |  |  |  |  |
| FNIP1    | 2,506109253 | 0,045246961 |  |  |  |  |  |
| PDGFC    | 2,500345362 | 0,020216069 |  |  |  |  |  |
| BDP1     | 2,488857318 | 0,023625258 |  |  |  |  |  |
| DNAJC10  | 2,483133105 | 0,026685928 |  |  |  |  |  |
| SERBP1   | 2,483133105 | 0,004439282 |  |  |  |  |  |
| GOPC     | 2,477422058 | 0,039407745 |  |  |  |  |  |
| MMS22L   | 2,477422058 | 0,033059192 |  |  |  |  |  |
| C6orf106 | 2,477422058 | 0,011024102 |  |  |  |  |  |
| TIMM17A  | 2,471724145 | 0,014860284 |  |  |  |  |  |
| PDIA4    | 2,471724145 | 0,006902242 |  |  |  |  |  |
| PRKCI    | 2,471724145 | 0,037534902 |  |  |  |  |  |
| CSNK2A2  | 2,460367604 | 0,013328679 |  |  |  |  |  |
| EIF4G1   | 2,454708916 | 0,003281905 |  |  |  |  |  |
| TOMM40   | 2,449063242 | 0,034691695 |  |  |  |  |  |
| ZC3H11A  | 2,443430553 | 0,033954105 |  |  |  |  |  |
| MAP3K2   | 2,437810818 | 0,01498325  |  |  |  |  |  |
| COG8     | 2,437810818 | 0,026257408 |  |  |  |  |  |
| SIX1     | 2,421029047 | 0,032540685 |  |  |  |  |  |
| DDX17    | 2,415460834 | 0,016189942 |  |  |  |  |  |
| UBTF     | 2,409905429 | 0,030141878 |  |  |  |  |  |
| ZMYND11  | 2,4043628   | 0,006671327 |  |  |  |  |  |
| ID1      | 2,4043628   | 0,042752165 |  |  |  |  |  |
| LARS     | 2,393315756 | 0,011960636 |  |  |  |  |  |
| TJP1     | 2,387811283 | 0,016713988 |  |  |  |  |  |
| GMEB1    | 2,382319469 | 0,018461684 |  |  |  |  |  |
| SGOL2    | 2,371373706 | 0,03477749  |  |  |  |  |  |
| USO1     | 2,365919697 | 0,04346265  |  |  |  |  |  |
| SRSF11   | 2,355049284 | 0,037993712 |  |  |  |  |  |
| PDCD10   | 2,349632821 | 0,034071863 |  |  |  |  |  |
